# Supplementary material
Source: PubMed Central journal article supplement (PMC8867924)
Supplement: NIHMS1773650-supplement-Suppl_Info.pdf [file NIHMS1773650-supplement-Suppl_Info.pdf]

# Mechanisms, regulation and functions of the unfolded protein response

---

*Claudio Hetz, Kezhong Zhang and Randal J. Kaufman*

<https://doi.org/10.1038/s41580-020-0250-z>

**Supplementary Table 1. IRE1 $\alpha$  binding partners and regulators.**

A summary of the proteins that form complexes with IRE1. The experimental protocols and cell types used to detect the protein-protein interactions are indicated, in addition to conditions (endogenous proteins, overexpressed, tagged proteins). The complexes that were validated in vitro using purified proteins are also indicated.

| Protein                                 | Method             | Endogenous complex | Overexpressed IRE1 (Tag: YES/NO) | Overexpressed interactor (Tag: YES/NO) | In vitro binding recombinant/purified proteins | Cell type                   | References |
|-----------------------------------------|--------------------|--------------------|----------------------------------|----------------------------------------|------------------------------------------------|-----------------------------|------------|
| <b>cABL1</b>                            | IP, PLA            | -                  | YES                              | NO                                     | Yes                                            | INS-1, MEFs, HEK            | 1,52       |
| <b>BAK</b>                              | PD/IP              | YES                | -                                | -                                      | YES                                            | MEF                         | 2          |
| <b>BAX</b>                              | PD/IP              | YES                | -                                | -                                      | YES                                            | MEF                         | 2          |
| <b>PUMA</b>                             | IPMS/PD/Y2H        | YES                | -                                | -                                      | YES                                            | MEF/HEK                     | 3          |
| <b>BIM</b>                              | IPMS/PD/Y2H        | YES                | -                                | -                                      | YES                                            | MEF/HEK                     | 3          |
| <b>BI-1</b>                             | IP/PD              | YES                | -                                | -                                      | YES                                            | MEF/HEK                     | 4          |
| <b>BiD</b>                              | PD/Y2H             | -                  | NO                               | YES                                    | YES                                            | HEK                         | 5          |
| <b>Caspases</b>                         | not determined     | -                  | -                                | -                                      | -                                              | -                           | 6          |
| <b>CHIP</b>                             | IPMS               | YES                | -                                | -                                      | -                                              | HEK                         | 7          |
| <b>AIP1</b>                             | IP                 | YES                | -                                | -                                      | -                                              | EC                          | 8          |
| <b>UFBP1</b>                            | IP                 | -                  | YES                              | YES                                    | -                                              | HEK                         | 9          |
| <b>ER protein targeting machineries</b> | PAR/CLIP/IPMS      | -                  | YES                              | -                                      | -                                              | HEK Trex                    | 10         |
| <b>Filamin A</b>                        | Y2H/IP/PD/CL       | YES                | -                                | -                                      | YES                                            | MEF/HEK/HU7                 | 11         |
| <b>Fortilin</b>                         | PLA/IP/BLI         | YES                | -                                | -                                      | YES                                            | PC3                         | 12         |
| <b>HSP47</b>                            | IPMS/PLA/IP/PD/MST | YES                | -                                | -                                      | YES                                            | MEF/HEK                     | 13         |
| <b>HSP90</b>                            | IP                 | YES                | -                                | -                                      | -                                              | COS-7/INS-1                 | 14, 15     |
| <b>HSP70</b>                            | IP/PD              | -                  | YES                              | NO                                     | YES                                            | PC12                        | 16         |
| <b>BiP</b>                              | IP/PD/MST          | YES                | -                                | -                                      | YES                                            | AT42J/HEK                   | 17, 18     |
| <b>IP3R1-3</b>                          | IP/PLA/PD          | -                  | YES                              | NO                                     | YES                                            | MEF/HEK                     | 19         |
| <b>JAB1</b>                             | Y2H/IP/PD/CL       | -                  | YES                              | YES                                    | -                                              | HEK                         | 20         |
| <b>Myosin heavy chain IIB</b>           | IPMS/IP            | -                  | YES                              | YES                                    | -                                              | HEK                         | 21         |
| <b>NMI</b>                              | MAPPIT-P           | -                  | NO                               | YES                                    | -                                              | HEK                         | 22         |
| <b>Optineurin</b>                       | IP                 | YES                | -                                | -                                      | -                                              | MODE/HT29/Ileal crypts      | 23         |
| <b>PARP16</b>                           | IP                 | -                  | YES                              | YES                                    | -                                              | Hela                        | 24         |
| <b>PDIA1</b>                            | IP/PD              | Yes                | -                                | -                                      | YES                                            | HepG2                       | 51         |
| <b>PDIA6</b>                            | IP/MST             | YES                | -                                | -                                      | YES                                            | HEK                         | 25, 26     |
| <b>PPM1I</b>                            | IPMS               | -                  | YES                              | YES                                    | -                                              | INS-1                       | 27         |
| <b>PKA</b>                              | Not tested         | -                  | -                                | -                                      | -                                              | -                           | 28         |
| <b>PKC</b>                              | IP/PD              | YES                | -                                | -                                      | YES                                            | LO2                         | 29         |
| <b>PSEN1</b>                            | IP                 | -                  | YES                              | NO                                     | -                                              | SK-N-SH                     | 30         |
| <b>PTP1B</b>                            | Not tested         | -                  | -                                | -                                      | -                                              | -                           | 31         |
| <b>RACK1</b>                            | IP                 | YES                | -                                | -                                      | -                                              | INS-1/HEPG2                 | 32         |
| <b>RIPK1</b>                            | IP                 | -                  | YES                              | YES                                    | -                                              | HEK                         | 33         |
| <b>RNF13</b>                            | IP                 | -                  | YES                              | YES                                    | -                                              | HEK                         | 34         |
| <b>RNH1</b>                             | IPMS/PLA           | YES                | -                                | -                                      | -                                              | HK-2                        | 35         |
| <b>RPAP2</b>                            | IP                 | -                  | NO                               | YES                                    | -                                              | OVCAR-8                     | 36         |
| <b>RTCB</b>                             | IP                 | YES                | -                                | -                                      | YES                                            | HEK                         | 37-40      |
| <b>Sec61</b>                            | IPMS/IP            | -                  | YES                              | YES                                    | YES                                            | HEK                         | 41, 42     |
| <b>SEL1L</b>                            | IP                 | -                  | YES                              | NO                                     | -                                              | HEK                         | 43         |
| <b>SIGMA-R1</b>                         | IP                 | -                  | YES                              | YES                                    | YES                                            | CHO                         | 44         |
| <b>HRD1</b>                             | IP                 | YES                | -                                | -                                      | -                                              | Synovial cells/HEK/HCT116   | 45         |
| <b>JIK</b>                              | Y2H/IP             | -                  | YES                              | YES                                    | -                                              | HEK                         | 46         |
| <b>TRAF2-6</b>                          | IP                 | YES                | -                                | -                                      | -                                              | Primary macrophages/HEK     | 32         |
| <b>Ubiquitin D</b>                      | MAPPIT             | YES                | -                                | -                                      | -                                              | HEK/EndoC- $\beta$ H1 cells | 47         |
| <b>USP14</b>                            | Y2H/IP             | YES                | -                                | -                                      | -                                              | MEF/HEK/PC6.3               | 48, 49     |
| <b>YIP1</b>                             | IP                 | YES                | -                                | -                                      | -                                              | HeLa                        | 50         |

IP: immunoprecipitation, PD: pull-down, IPMS: immunoprecipitation followed by mass spec analysis, Y2H: yeast two hybrid, PLA: proximity ligation assay, CL: crosslinking, MAPPIT: mammalian protein-protein interaction trap

## Supplementary references Table S1

1. Morita, S. et al. Targeting ABL-IRE1alpha Signaling Spares ER-Stressed Pancreatic beta Cells to Reverse Autoimmune Diabetes. *Cell Metab* **25**, 883-897 e8 (2017).
2. Hetz, C. et al. Proapoptotic BAX and BAK modulate the unfolded protein response by a direct interaction with IRE1alpha. *Science* **312**, 572-6 (2006).
3. Rodriguez, D.A. et al. BH3-only proteins are part of a regulatory network that control the sustained signalling of the unfolded protein response sensor IRE1alpha. *EMBO J* **31**, 2322-35 (2012).
4. Lisbona, F. et al. BAX inhibitor-1 is a negative regulator of the ER stress sensor IRE1alpha. *Molecular cell* **33**, 679-91 (2009).
5. Bashir, S. & Majid Fazili, K. Bid as a novel interacting partner of IRE1 differentially regulating its RNase activity. *BioRxiv* (2019).
6. Shemorry, A. et al. Caspase-mediated cleavage of IRE1 controls apoptotic cell commitment during endoplasmic reticulum stress. *Elife* **8** (2019).
7. Zhu, X. et al. Ubiquitination of inositol-requiring enzyme 1 (IRE1) by the E3 ligase CHIP mediates the IRE1/TRAF2/JNK pathway. *J Biol Chem* **289**, 30567-77 (2014).
8. Luo, D. et al. AIP1 is critical in transducing IRE1-mediated endoplasmic reticulum stress response. *J Biol Chem* **283**, 11905-12 (2008).
9. Liu, J. et al. A critical role of DDRGK1 in endoplasmic reticulum homeostasis via regulation of IRE1alpha stability. *Nat Commun* **8**, 14186 (2017).
10. Acosta-Alvear, D. et al. The unfolded protein response and endoplasmic reticulum protein targeting machineries converge on the stress sensor IRE1. *Elife* **7** (2018).
11. Urrea, H. et al. IRE1alpha governs cytoskeleton remodelling and cell migration through a direct interaction with filamin A. *Nat Cell Biol* **20**, 942-953 (2018).
12. Pinkaew, D. et al. Fortilin binds IRE1alpha and prevents ER stress from signaling apoptotic cell death. *Nat Commun* **8**, 18 (2017).
13. Sepulveda, D. et al. Interactome Screening Identifies the ER Luminal Chaperone Hsp47 as a Regulator of the Unfolded Protein Response Transducer IRE1alpha. *Mol Cell* **69**, 238-252 e7 (2018).
14. Marcu, M.G. et al. Heat shock protein 90 modulates the unfolded protein response by stabilizing IRE1alpha. *Mol Cell Biol* **22**, 8506-13 (2002).
15. Ota, A. & Wang, Y. Cdc37/Hsp90 protein-mediated regulation of IRE1alpha protein activity in endoplasmic reticulum stress response and insulin synthesis in INS-1 cells. *J Biol Chem* **287**, 6266-74 (2012).
16. Gupta, S. et al. HSP72 protects cells from ER stress-induced apoptosis via enhancement of IRE1alpha-XBP1 signaling through a physical interaction. *PLoS biology* **8**, e1000410 (2010).
17. Bertolotti, A., Zhang, Y., Hendershot, L.M., Harding, H.P. & Ron, D. Dynamic interaction of BiP and ER stress transducers in the unfolded-protein response. *Nat Cell Biol* **2**, 326-32 (2000).
18. Carrara, M., Prischi, F., Nowak, P.R., Kopp, M.C. & Ali, M.M. Noncanonical binding of BiP ATPase domain to Ire1 and Perk is dissociated by unfolded protein CH1 to initiate ER stress signaling. *Elife* **4** (2015).
19. Carreras-Sureda, A. et al. Non-canonical function of IRE1alpha determines mitochondria-associated endoplasmic reticulum composition to control calcium transfer and bioenergetics. *Nat Cell Biol* **21**, 755-767 (2019).
20. Oono, K. et al. JAB1 participates in unfolded protein responses by association and dissociation with IRE1. *Neurochem Int* **45**, 765-72 (2004).
21. He, Y. et al. Nonmuscle Myosin IIB Links Cytoskeleton to IRE1alpha Signaling during ER Stress. *Dev Cell* **23**, 1141-52 (2012).
22. Brozzi, F. et al. A combined "omics" approach identifies N-Myc interactor as a novel cytokine-induced regulator of IRE1 protein and c-Jun N-terminal kinase in pancreatic beta cells. *J Biol Chem* **289**, 20677-93 (2014).
23. Tschurtschenthaler, M. et al., Defective ATG16L1-mediated removal of IRE1alpha drives Crohn's disease-like ileitis. *J Exp Med* **214**:401-22 (2017) .
24. Jwa, M. & Chang, P. PARP16 is a tail-anchored endoplasmic reticulum protein required for the PERK- and IRE1alpha-mediated unfolded protein response. *Nat Cell Biol* **14**, 1223-30 (2012).
25. Eletto, D., Dersh, D., Gidalevitz, T. & Argon, Y. Protein disulfide isomerase A6 controls the decay of IRE1alpha signaling via disulfide-dependent association. *Mol Cell* **53**, 562-576 (2014).
26. Groenendyk, J. et al. Interplay between the oxidoreductase PDIA6 and microRNA-322 controls the response to disrupted endoplasmic reticulum calcium homeostasis. *Sci Signal* **7**, ra54 (2014).
27. Lu, G. et al. PPM1l encodes an inositol requiring-protein 1 (IRE1) specific phosphatase that regulates the functional outcome of the ER stress response. *Mol Metab* **2**, 405-16 (2013).
28. Mao, T. et al. PKA phosphorylation couples hepatic inositol-requiring enzyme 1alpha to glucagon signaling in glucose metabolism. *Proc Natl Acad Sci U S A* **108**, 15852-7 (2011).
29. Shin, G.C. et al. PRKCSH contributes to tumorigenesis by selective boosting of IRE1 signaling pathway. *Nat Commun* **10**, 3185 (2019).
30. Katayama, T. et al. Presenilin-1 mutations downregulate the signalling pathway of the unfolded-protein response. *Nat Cell Biol* **1**, 479-85 (1999).
31. Gu, F. et al. Protein-tyrosine phosphatase 1B potentiates IRE1 signaling during endoplasmic reticulum stress. *J Biol Chem* **279**, 49689-93 (2004).
32. Qiu, Y. et al. A crucial role for RACK1 in the regulation of glucose-stimulated IRE1alpha activation in pancreatic beta cells. *Science signaling* **3**, ra7 (2010).
33. Fidler, I.J. & Kripke, M.L. The challenge of targeting metastasis. *Cancer Metastasis Rev* **34**, 635-41 (2015).
34. Arshad, M. et al. RNF13, a RING finger protein, mediates endoplasmic reticulum stress-induced apoptosis through the inositol-requiring enzyme (IRE1alpha)/c-Jun NH2-terminal kinase pathway. *J Biol Chem* **288**, 8726-36 (2013).
35. Tavernier, Q. et al. Regulation of IRE1 RNase activity by the Ribonuclease inhibitor 1 (RNH1). *Cell Cycle* **17**, 1901-1916 (2018).

36. Chang, T.K. et al. Coordination between Two Branches of the Unfolded Protein Response Determines Apoptotic Cell Fate. *Mol Cell* **71**, 629-636 e5 (2018).
37. Jurkin, J. et al. The mammalian tRNA ligase complex mediates splicing of XBP1 mRNA and controls antibody secretion in plasma cells. *EMBO J* **33**, 2922-36 (2014).
38. Kosmaczewski, S.G. et al. The RtcB RNA ligase is an essential component of the metazoan unfolded protein response. *EMBO Rep* **15**, 1278-85 (2014).
39. Lu, Y., Liang, F.X. & Wang, X. A synthetic biology approach identifies the mammalian UPR RNA ligase RtcB. *Mol Cell* **55**, 758-70 (2014).
40. Ray, A., Zhang, S., Rentas, C., Caldwell, K.A. & Caldwell, G.A. RTCB-1 mediates neuroprotection via XBP-1 mRNA splicing in the unfolded protein response pathway. *J Neurosci* **34**, 16076-85 (2014).
41. Plumb, R., Zhang, Z.R., Appathurai, S. & Mariappan, M. A functional link between the co-translational protein translocation pathway and the UPR. *Elife* **4** (2015).
42. Sundaram, A., Plumb, R., Appathurai, S. & Mariappan, M. The Sec61 translocon limits IRE1alpha signaling during the unfolded protein response. *Elife* **6** (2017).
43. Sun, S. et al. IRE1alpha is an endogenous substrate of endoplasmic-reticulum-associated degradation. *Nat Cell Biol* **17**, 1546-55 (2015).
44. Mori, T., Hayashi, T., Hayashi, E. & Su, T.P. Sigma-1 receptor chaperone at the ER-mitochondrion interface mediates the mitochondrion-ER-nucleus signaling for cellular survival. *PLoS One* **8**, e76941 (2013).
45. Gao, B. et al. Synoviolin promotes IRE1 ubiquitination and degradation in synovial fibroblasts from mice with collagen-induced arthritis. *EMBO Rep* **9**, 480-5 (2008).
46. Yoneda, T. et al. Activation of caspase-12, an endoplasmic reticulum (ER) resident caspase, through tumor necrosis factor receptor-associated factor 2-dependent mechanism in response to the ER stress. *J Biol Chem* **276**, 13935-40 (2001).
47. Brozzi, F. et al. Ubiquitin D Regulates IRE1alpha/c-Jun N-terminal Kinase (JNK) Protein-dependent Apoptosis in Pancreatic Beta Cells. *J Biol Chem* **291**, 12040-56 (2016).
48. Hyrskyluoto, A. et al. Ubiquitin-specific protease-14 reduces cellular aggregates and protects against mutant huntingtin-induced cell degeneration: involvement of the proteasome and ER stress-activated kinase IRE1alpha. *Hum Mol Genet* **23**, 5928-39 (2014).
49. Nagai, A. et al. USP14 inhibits ER-associated degradation via interaction with IRE1alpha. *Biochem Biophys Res Commun* **379**, 995-1000 (2009).
50. Taguchi, Y. et al. Yip1A, a novel host factor for the activation of the IRE1 pathway of the unfolded protein response during Brucella infection. *PLoS Pathog* **11**, e1004747 (2015).
51. Yu, J. et al. Phosphorylation switches protein disulfide isomerase activity to maintain proteostasis and attenuate ER stress. *EMBO J*, e103841, doi:10.15252/emj.2019103841 (2020).
52. Dufey E. et al. Genotoxic stress triggers the selective activation of IRE1 $\alpha$ -dependent RNA decay to modulate the DNA damage response. *Nature Com.* In press. doi: 10.1038/s41467-020-15694-y (2020).
